# Supplementary material for: Snowfall distribution and its response to the Arctic Oscillation: An evaluation of HighResMIP models in the Arctic using CPR/CloudSat observations
Source: Copernicus journal article supplement (doi:10.5194/gmd-2019-12), 2019-03-19
Supplement: Supplementary file 1 [file gmd-2019-12-supplement.pdf]

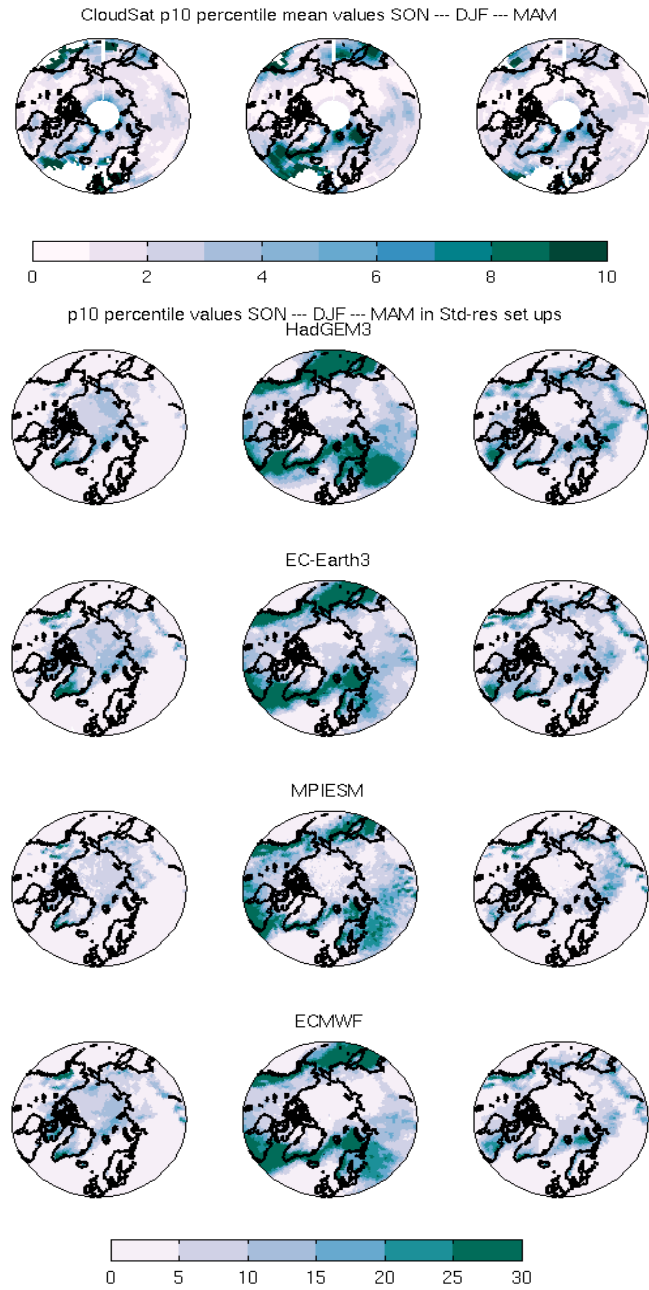

**Figure S1.** 10-percentile thresholds of monthly snowfall accumulations (mm/month) for the SON, DJF and MAM months in the 3 columns respectively. The top row shows the CloudSat observations and the other four rows below show snowfall from the Low-Res (or Std-Res) setups of HadGEM3, EC-Earth3, MPIESM and ECMWF respectively.

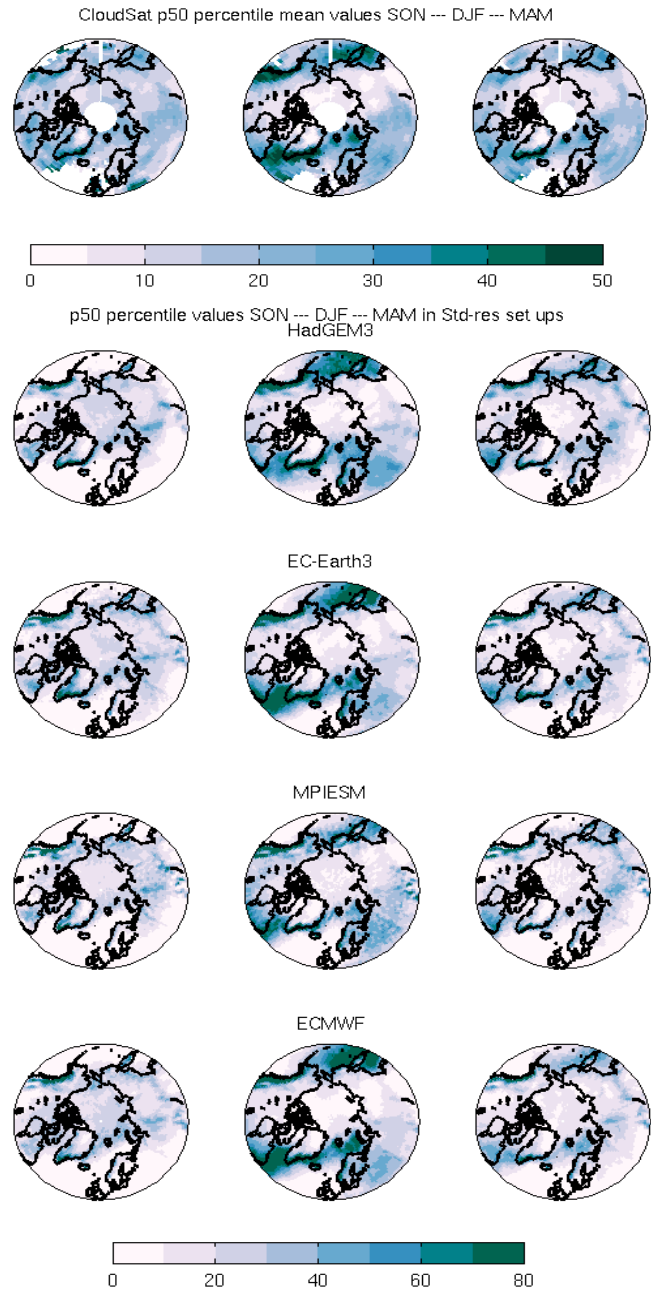

**Figure S2.** Same as Fig. S1, but, at 50-percentile threshold.

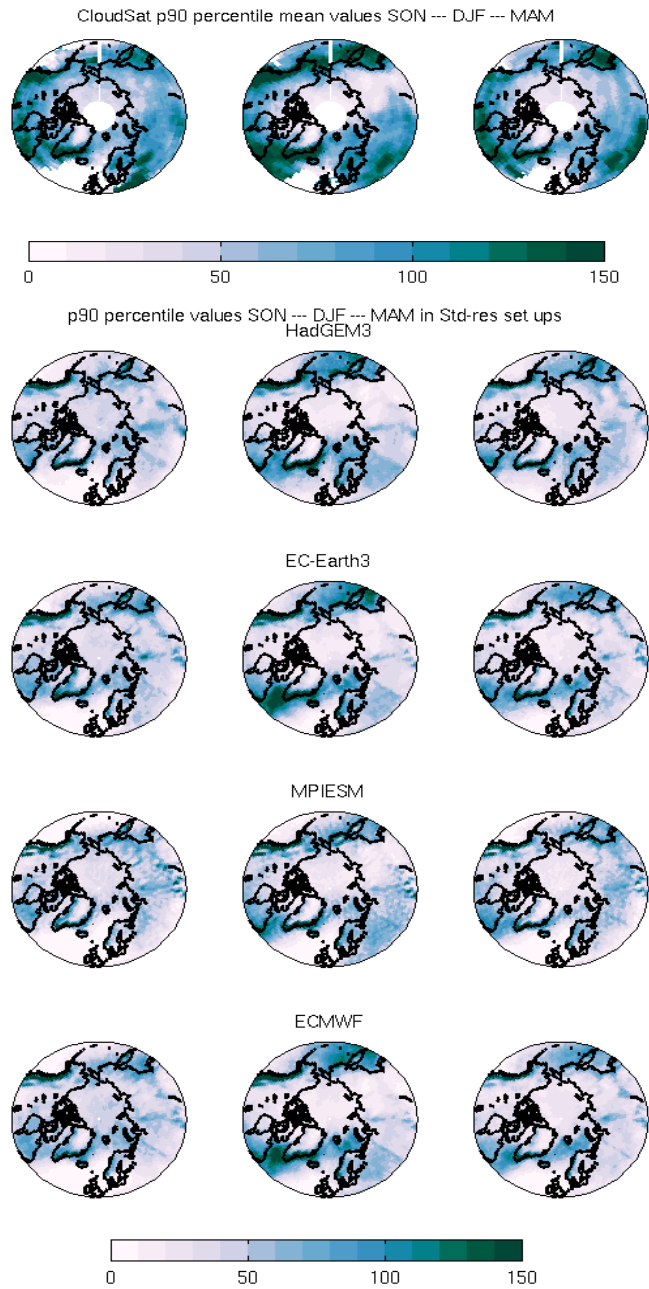

**Figure S3.** Same as Fig. S1, but, at 90-percentile threshold.
